# Supplementary material
Source: PubMed Central journal article supplement (PMC3152603)

**A**

Untransfected control      Transfected control      dn PPAR $\delta$

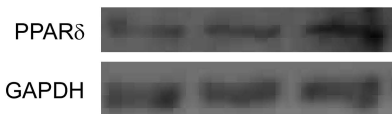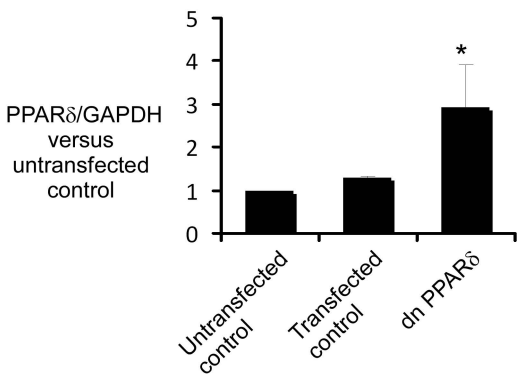**B**

Scrambled siRNA       $\beta$ -catenin siRNA

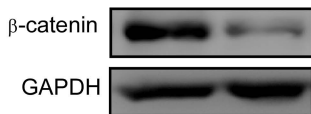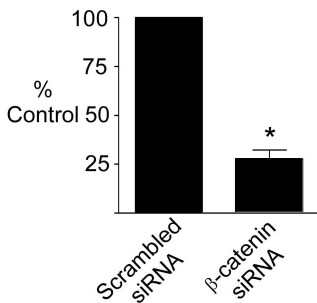**C**

Scrambled siRNA      p120 siRNA

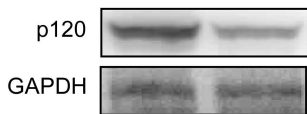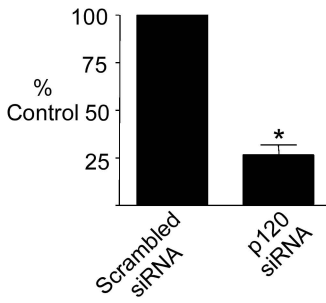

Supplement: NIHMS297723-supplement-02.pdf [file NIHMS297723-supplement-02.pdf]
