# Supplementary material
Source: PubMed Central journal article supplement (PMC3152603)

**A**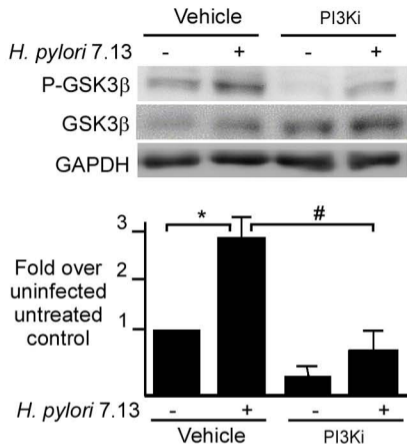**B**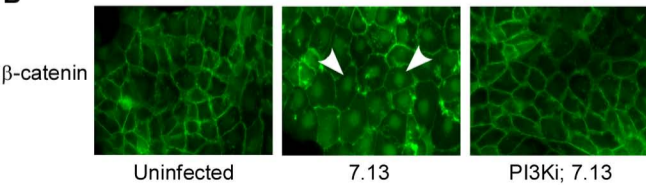**C**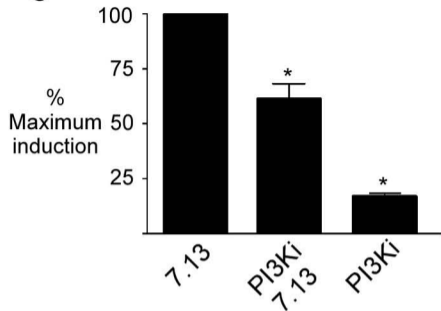

Supplement: NIHMS297723-supplement-03.pdf [file NIHMS297723-supplement-03.pdf]

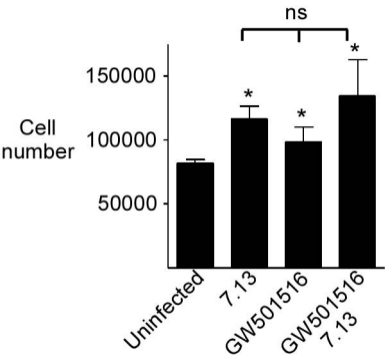

Supplement: NIHMS297723-supplement-04.pdf [file NIHMS297723-supplement-04.pdf]

**A**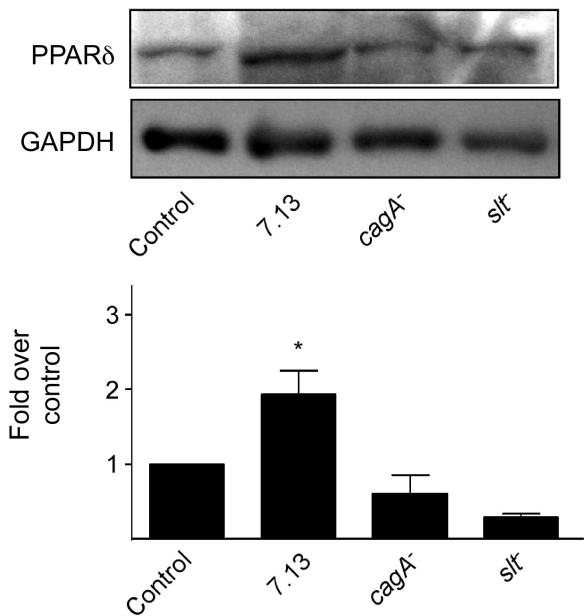**B**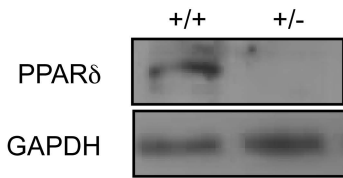

Supplement: NIHMS297723-supplement-05.pdf [file NIHMS297723-supplement-05.pdf]
